# Supplementary material
Source: PubMed Central journal article supplement (PMC1236539)

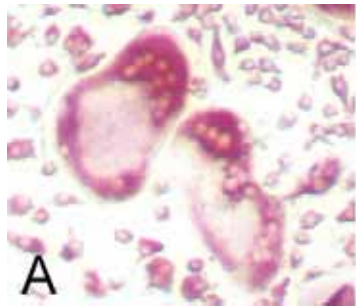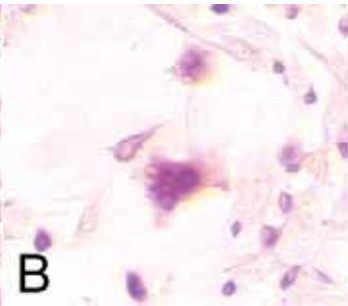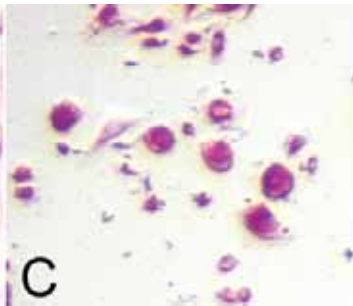

Supplement: pnas_0503544102_1.pdf [file pnas_0503544102_1.pdf]
